# Supplementary material for: Physical and functional interaction between A20 and ATG16L1-WD40 domain in the control of intestinal homeostasis
Source: PubMed Central journal article supplement (PMC6478926; doi:10.1038/s41467-019-09667-z), 2019-04-23
Supplement: 41467_2019_9667_MOESM1_ESM.pdf [file 41467_2019_9667_MOESM1_ESM.pdf]

## **Supplementary Information**

**Physical and functional interaction between A20 and ATG16L1-WD40 domain in the control of intestinal homeostasis**

**Slowicka *et al.***

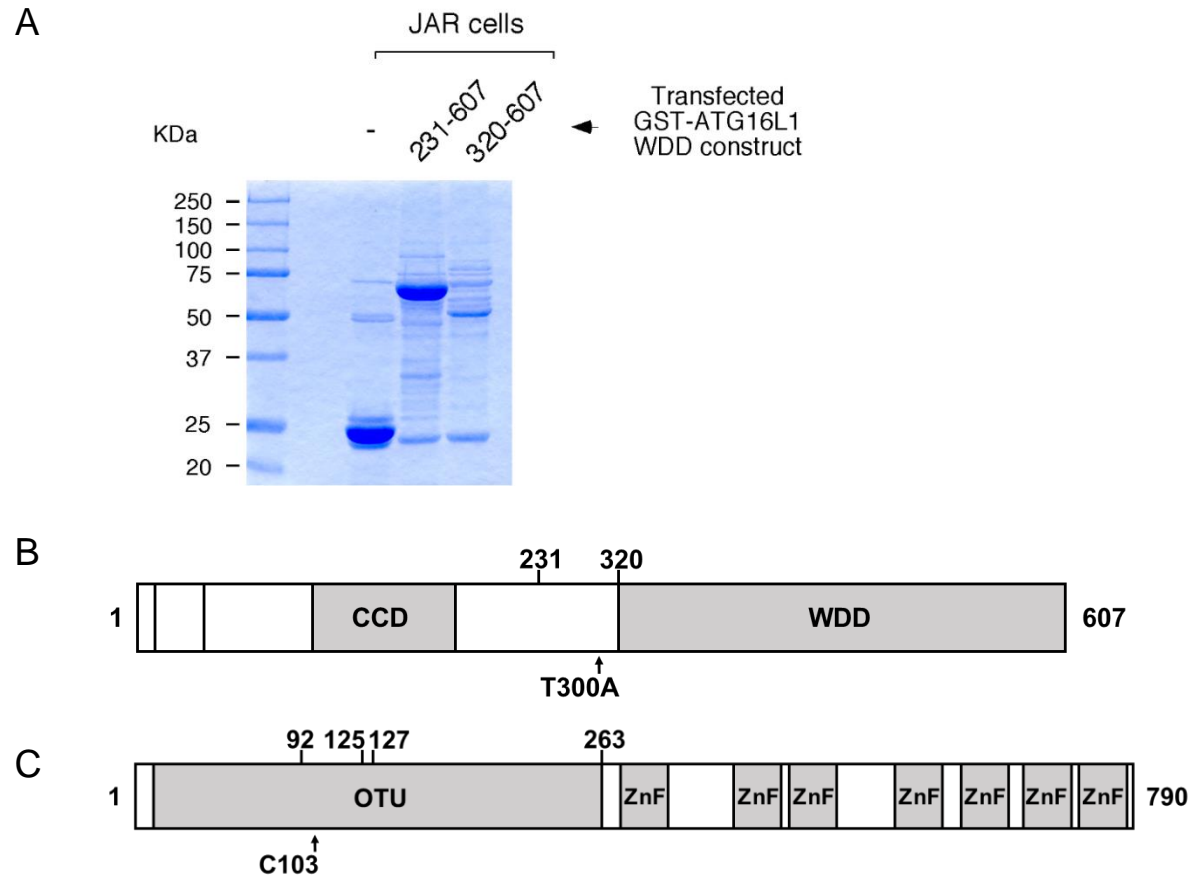

**Supplementary Figure 1. Superior stability of GST-ATG16L1 231-607 compared to GST-ATG16L1 320-607 upon expression in JAR cells.**

**(A)** Cells were transfected with mammalian expression plasmids encoding the indicated constructs (5 x 6 cm plates per construct). 36 h post-transfection, cells were lysed and the resulting lysates incubated with agarose-GST beads for immunoprecipitation of the fusion proteins. After two washes, beads were resuspended in 2x RSB and boiled. Half of the final supernatant (equivalent to 3 x 6 cm plates per construct) was resolved in a 10% polyacrylamide gel and stained with Coomassie solution. Shown is a picture of the stained gel indicating the transfected constructs in each case. **(B)** Domain structure of human ATG16L1 with the coiled-coil domain (CCD) and the N-terminal WD40 domain (WDD). T300A represents the Crohn's Disease susceptibility polymorphism. **(C)** Domain structure of human A20. The N-terminal OTU domain is essential for deubiquitinating (DUB) activity. C103 represents the catalytic cysteine residue. The C-terminal region of A20 contains seven zinc fingers (ZnF).

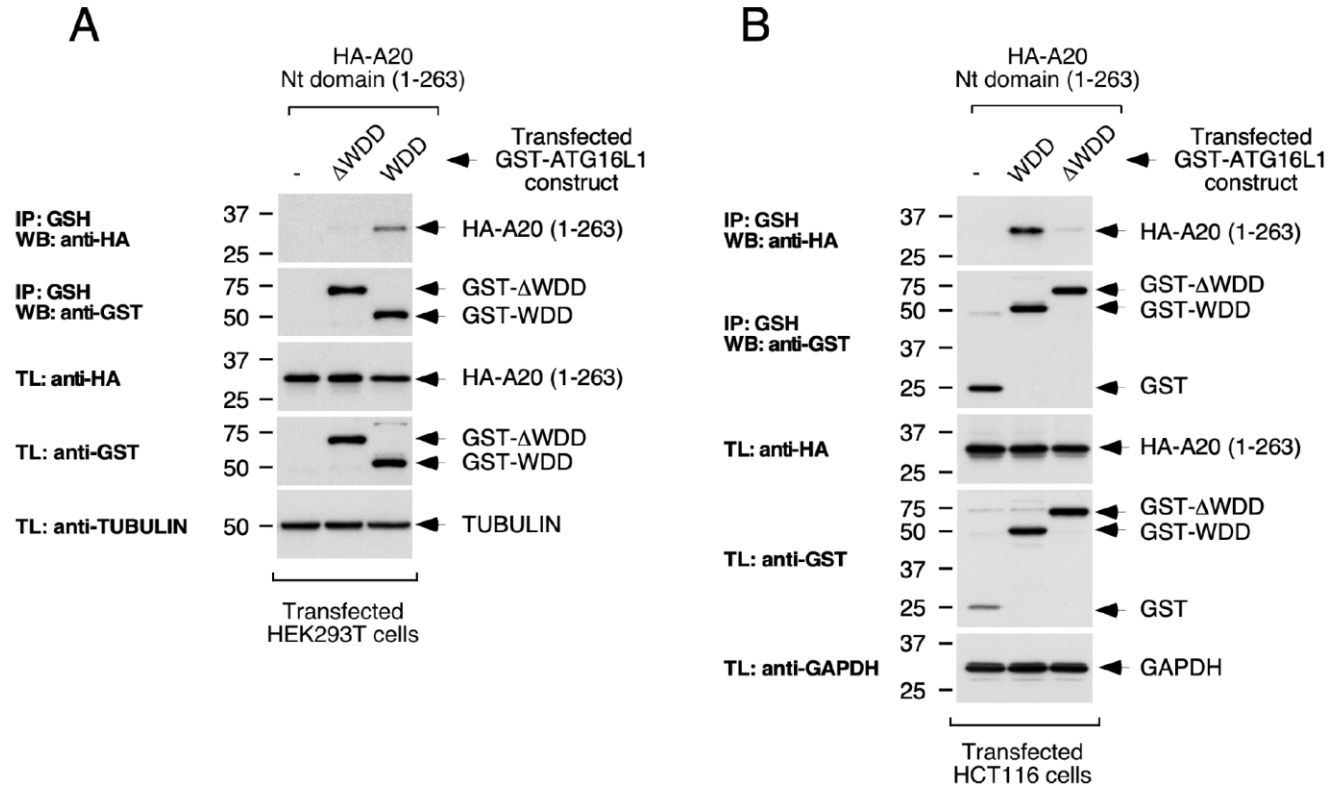

**Supplementary Figure 2. The WDD of ATG16L1 (residues 320-607) interacts with A20 in both HEK293T and intestinal HCT116 cells. (A-B) A20-1-263 specifically co-precipitates with GST-WDD but not with GST- $\Delta$ WDD in both HEK293T cells (A) and HCT116 cells (B). The displayed co-immunoprecipitation assays were done as in Fig. 2.**

## Supplementary Figure 3

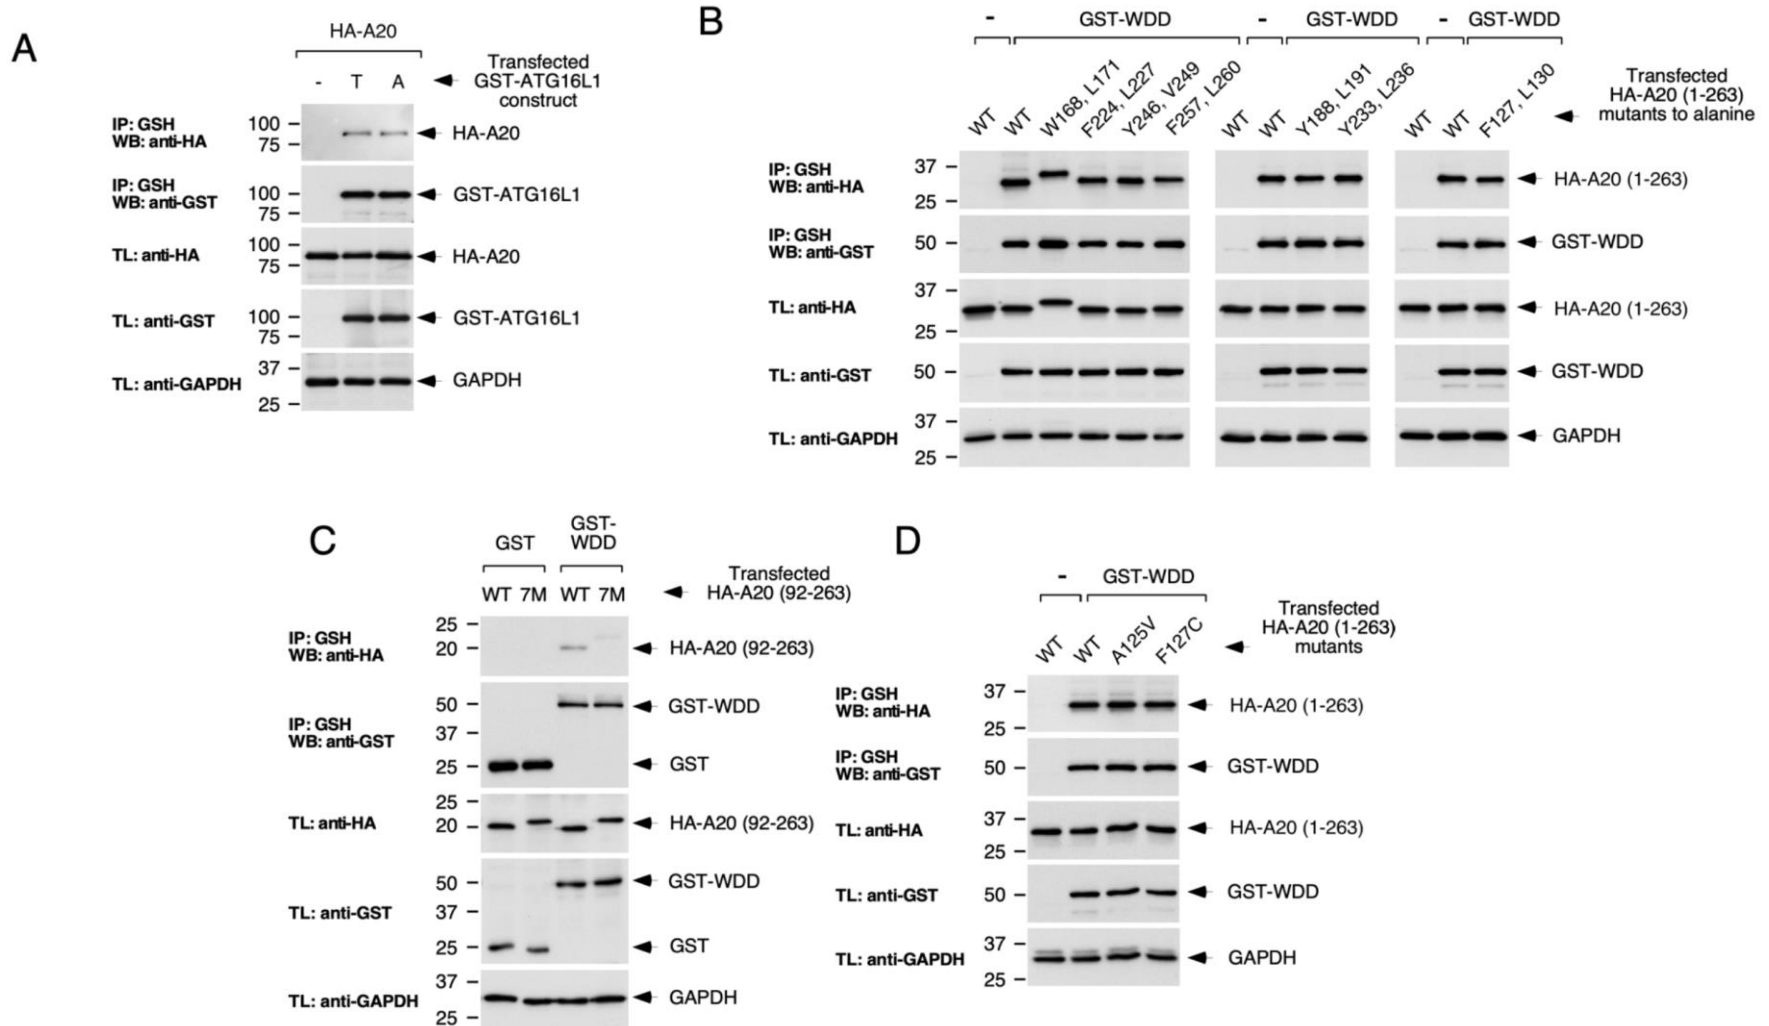

**Supplementary Figure 3.** (A) The Crohn's disease risk mutation T300A does not alter the ability of ATG16L1 to co-precipitate with A20. (B) Individual mutation of candidate WDD-binding motifs present in A20 92-263 region does not impair the interaction between A20 1-263 and the WDD. (C) Simultaneous mutation of the 7 candidate WDD-binding motifs (7M) prevents binding between A20 92-263 and the WDD. (D) Mutations A125V and F127C in A20 do not influence the interaction between A20 1-263 and the WDD. All panels show co-immunoprecipitation assays carried out with the indicated constructs as in Fig. 2.

## Supplementary Figure 4

**A**

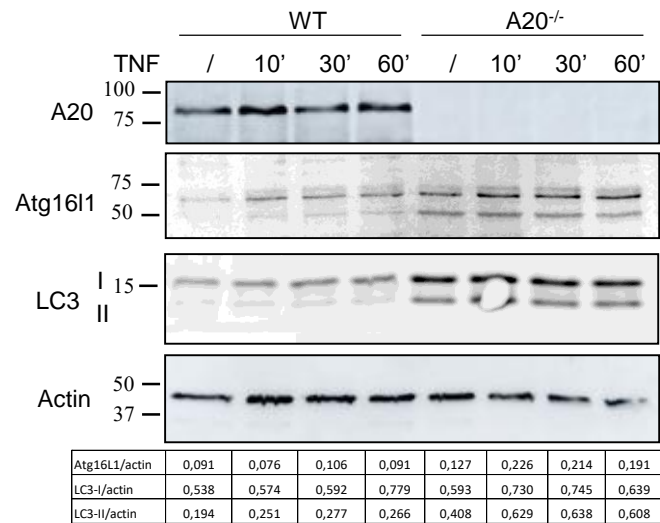

**B**

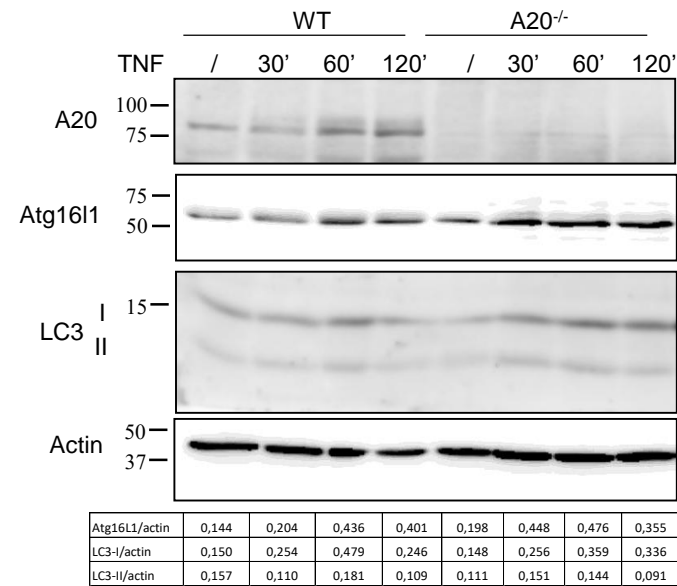

**Supplementary Figure 4. A20 deficiency increases Atg16L1 expression and LC3-II expression levels. (A)** Immortalized MEFs were stimulated with 1000 IU/ml of recombinant murine TNF for indicated time points. Data representative of 5 independent experiments. **(B)** Small intestinal organoids were stimulated with 10 ng/ml recombinant TNF for indicated time points. Data representative of 3 independent experiments.

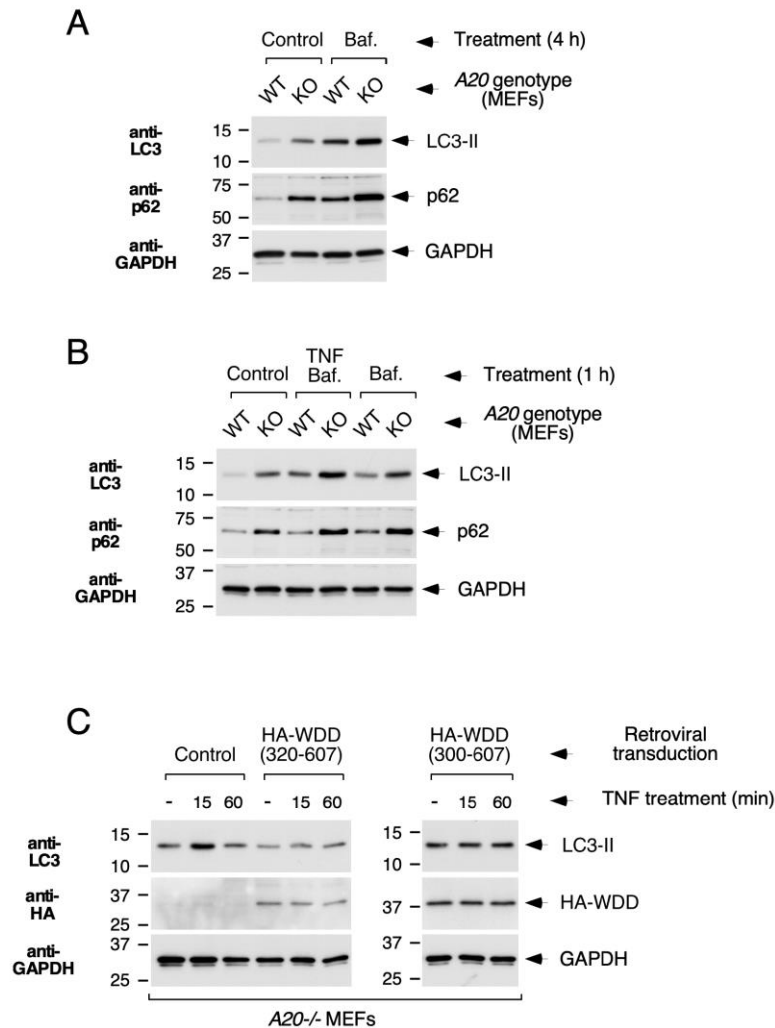

**Supplementary Figure 5. (A-B) Increased autophagic flux in A20-deficient cells, both basally (A) and upon TNF treatment (B).** Wild-type and A20-deficient MEFs were treated with bafilomycin (Baf., 75 nM) and/or TNF (30 ng/ml) for the indicated times. Cells were then lysed and the resulting total cell lysates were processed for Western-blotting with the shown antibodies. **(C)** Expression of the WDD dominantly inhibits LC3 lipidation induced by TNF treatment in A20-deficient MEFs. A20<sup>-/-</sup> cells were transduced with retroviral constructs expressing the indicated constructs of the WDD and then subjected to TNF treatment (30 ng/ml) for the indicated times. Cells were lysed and the corresponding total cell lysates subjected to Western-blotting with the indicated antibodies.

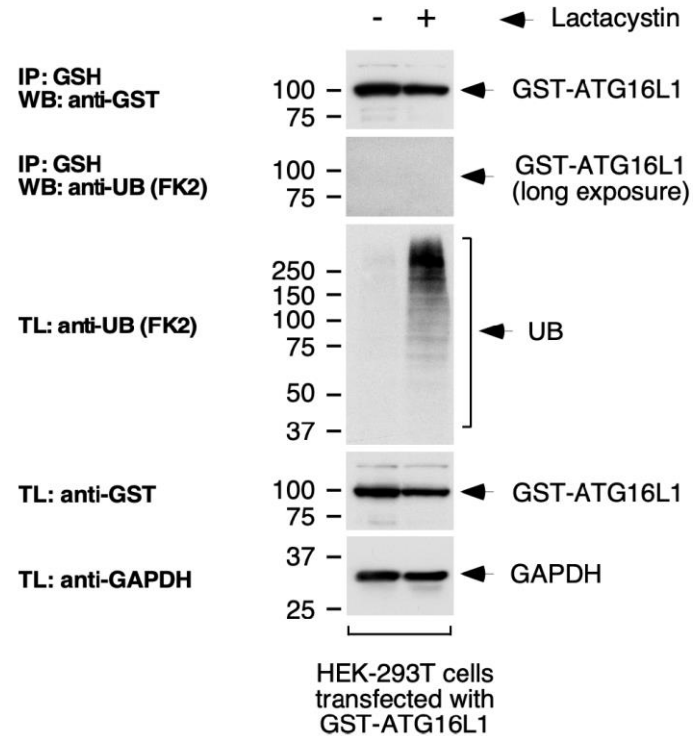

**Supplementary Figure 6. Transfected GST-ATG16L1 is not ubiquitinated nor stabilized by the proteasome inhibitor lactacystin.** HEK-293T cells were transfected with GST-ATG16L1 and treated with lactacystin (10  $\mu$ M) for the last 12 h of culture. Cells were lysed and GST-ATG16L1 immunoprecipitated with agarose-GSH beads. The resulting immunoprecipitates and total lysates were processed for Western-blotting using the indicated antibodies.





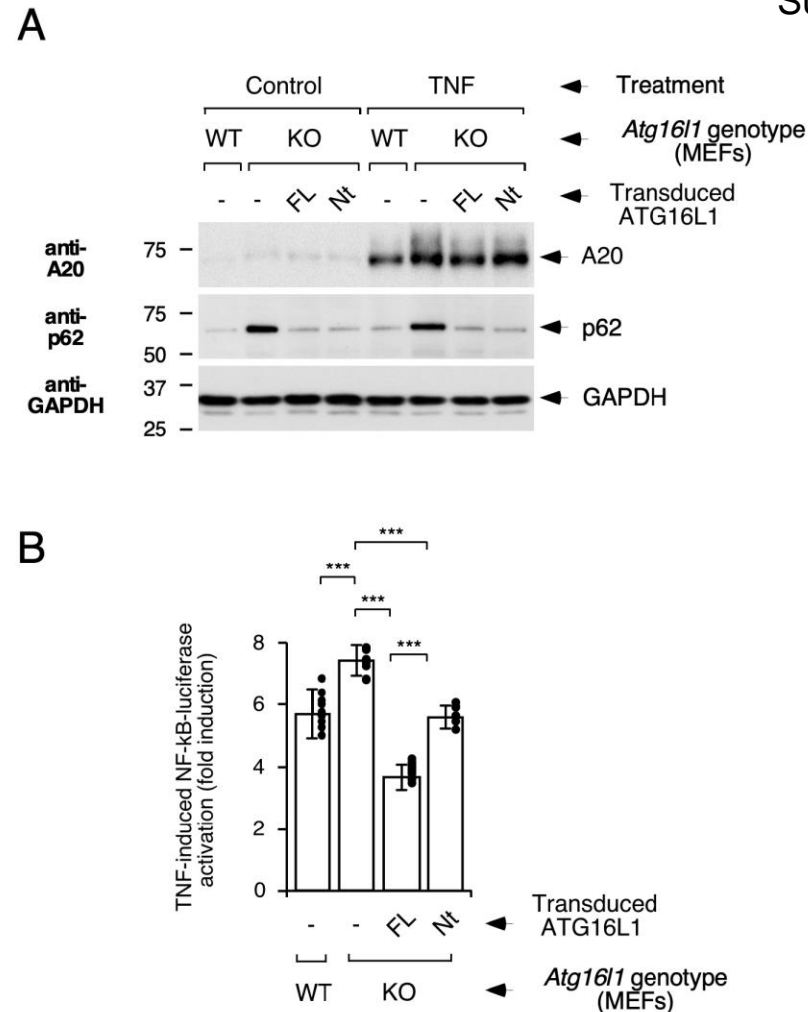

**Supplementary Figure 8. (A) Expression of endogenous A20 is regulated by ATG16L1.** The indicated wild-type or Atg16L1-deficient MEFs (control (-) or reconstituted with the shown versions of ATG16L1 (full-length: FL; N-terminal domain (1-299): Nt)) were subjected to TNF treatment (30 ng/ml) for 1 h, as shown. Cells were then lysed and processed for Western-blotting with the indicated antibodies. **(B) ATG16L1 regulates NF- $\kappa$ B activation in response to TNF.** The same MEFs shown in A were transduced with a retroviral construct harboring an NF- $\kappa$ B-luciferase reporter cassette, treated with TNF (30 ng/ml, 4 h) and lysed to measure luciferase activity. Shown are average values and the corresponding standard deviations of fold-induction figures obtained from triplicate experimental points (Student's t-test; (\*\*\*)  $p < 0,001$ ).

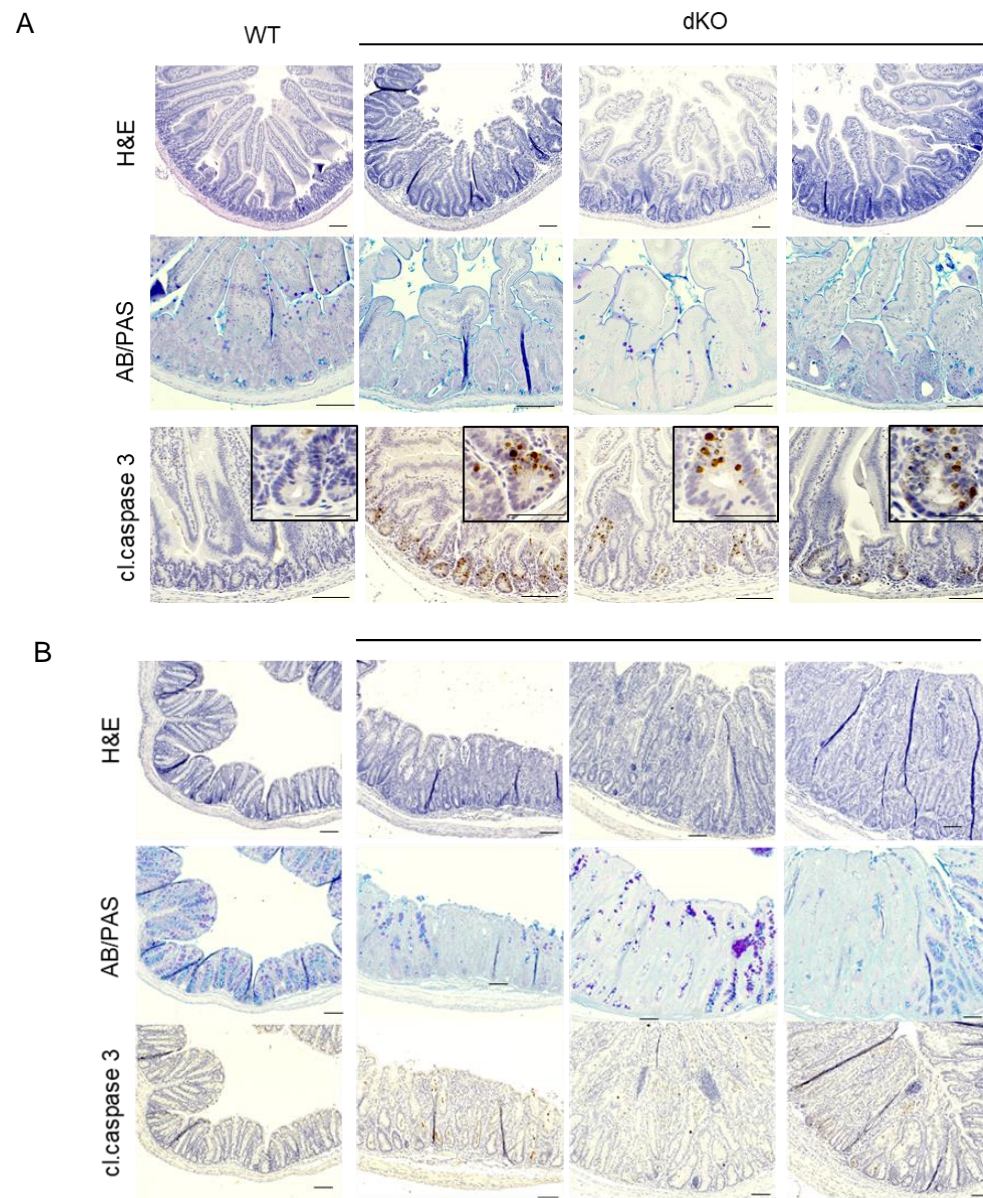

**Supplementary Figure 9. (A-B)** Hematoxylin-eosin (H&E), AB/PAS and cleaved caspase-3 staining on sections of the proximal small intestinal (A) and colon (B) of three 3-4 week old control (WT) and dKO mice, showing cell death and loss of secretory cells. Scale bar, 100  $\mu$ m; 50  $\mu$ m zoom-in panel.

## Supplementary Figure 10

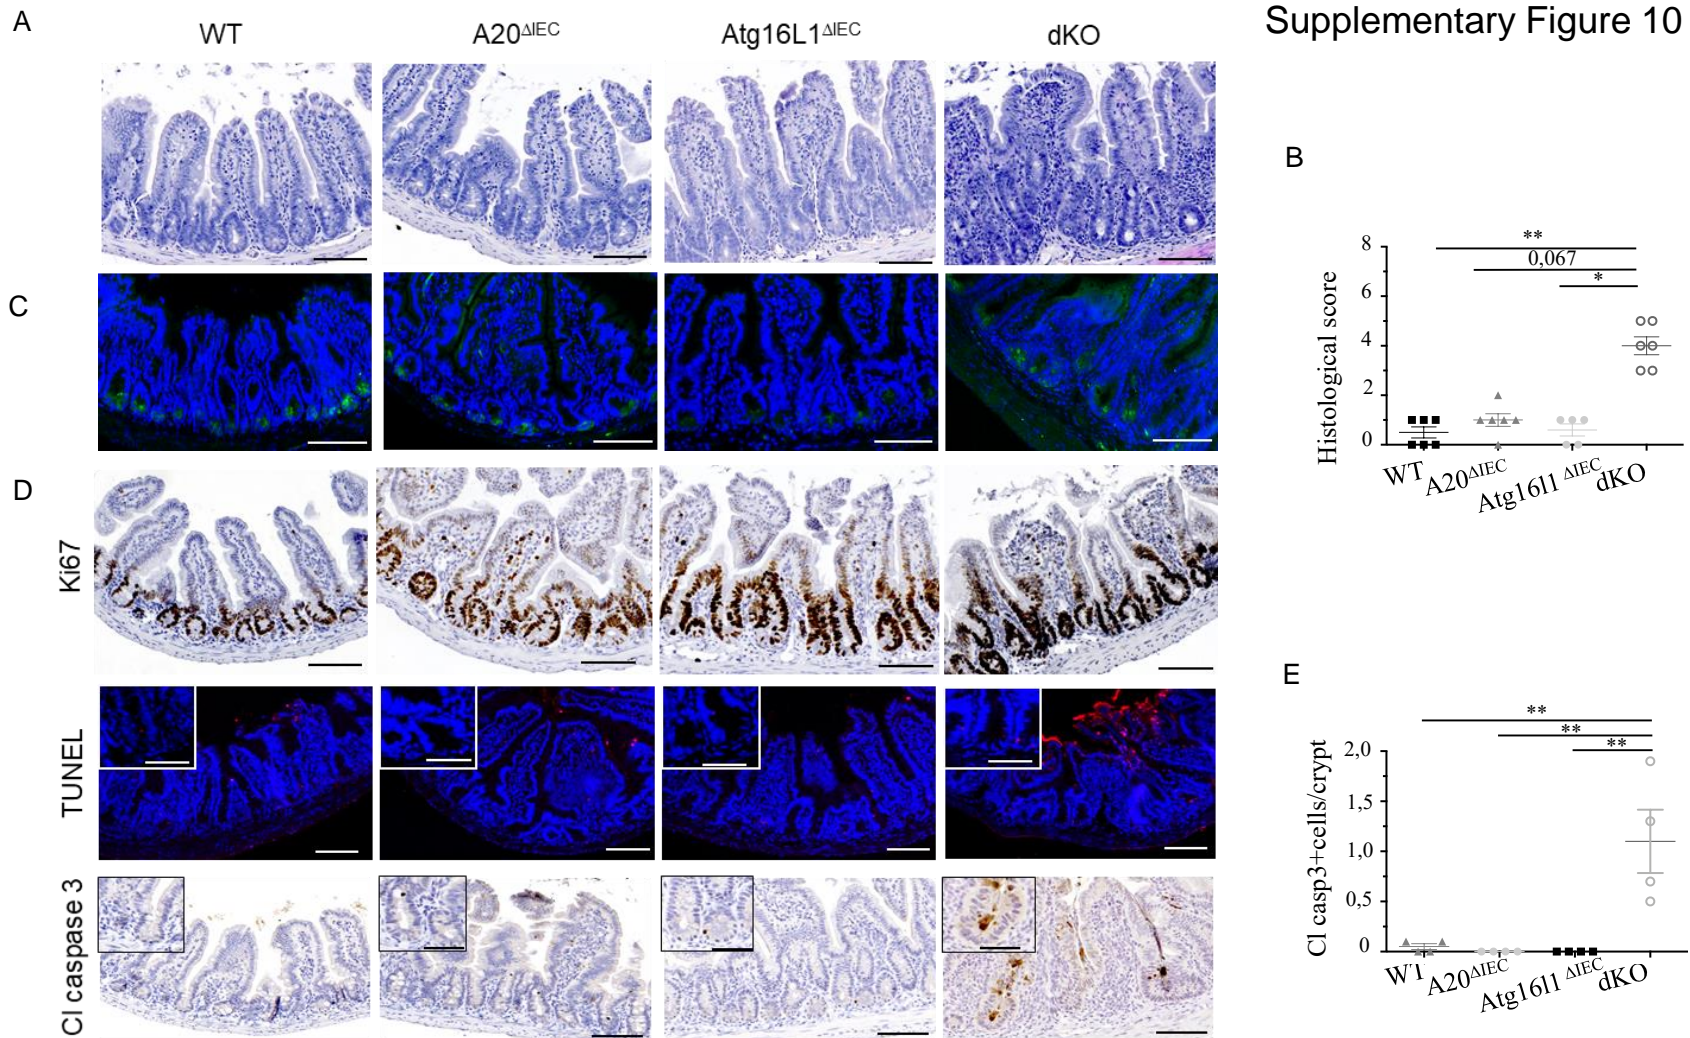

**Supplementary Figure 10. (A)** Hematoxylin-eosin (H&E) staining of distal small intestinal sections of 20 week old control (WT), A20 $\Delta$ IEC, Atg16L1 $\Delta$ IEC and dKO mice (A; scale bar, 100 $\mu$ m). **(B)** Histological scoring of small intestinal sections from WT, A20 $\Delta$ IEC, Atg16L1 $\Delta$ IEC and dKO mice of distal small intestine. Each symbol represents one mouse. \*,  $p < 0,05$ . **(C)** Immunofluorescent staining of distal small intestinal sections using an antibody recognizing lysozyme in intracellular granules of Paneth cells (green) in WT, A20 $\Delta$ IEC, Atg16L1 $\Delta$ IEC and dKO mice. Cell nuclei were counterstained with DAPI (blue). Scale bar, 100  $\mu$ m. **(D)** Immunostaining for Ki67, TUNEL (red) and cleaved caspase 3 on sections from the distal small intestine of WT, A20 $\Delta$ IEC, Atg16L1 $\Delta$ IEC and dKO mice. Images representative of  $n=5$  mice per genotype. Cell nuclei were counterstained with DAPI. Scale bars, 100  $\mu$ m; inserts 50  $\mu$ m. **(E)** Quantification of cleaved caspase 3-positive cells in sections from the distal small intestine of WT, A20 $\Delta$ IEC, Atg16L1 $\Delta$ IEC and dKO mice.



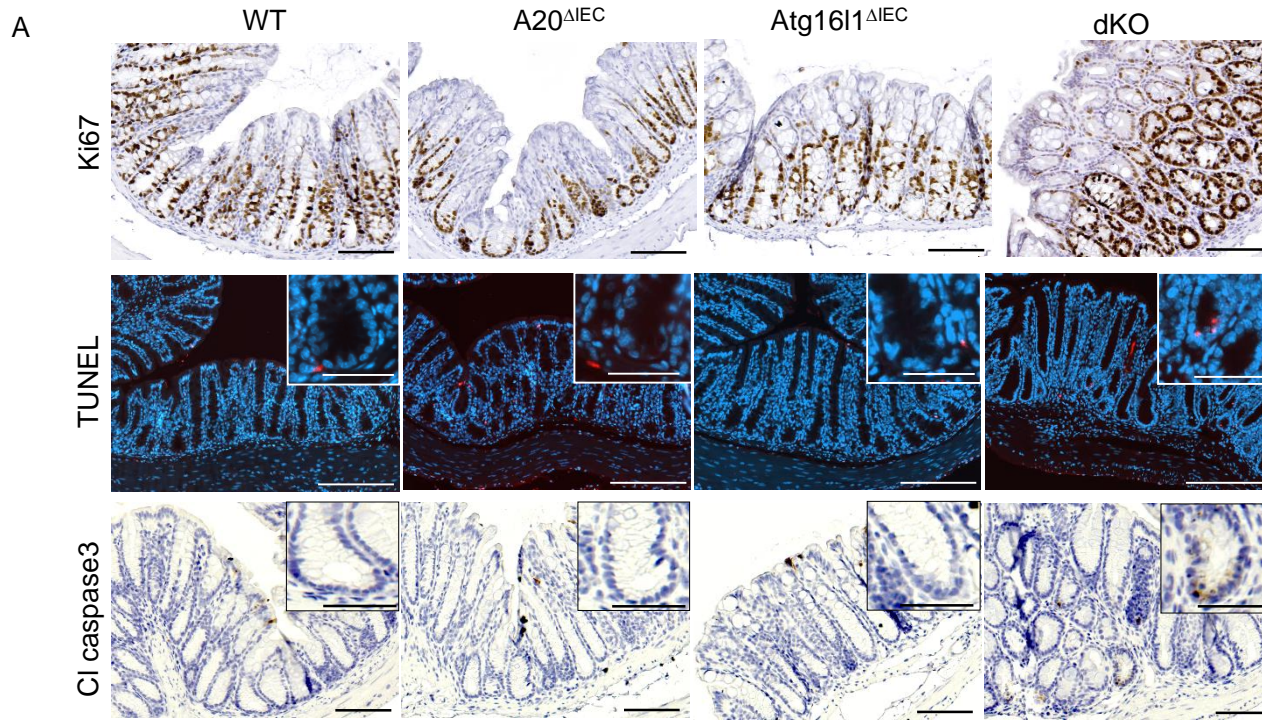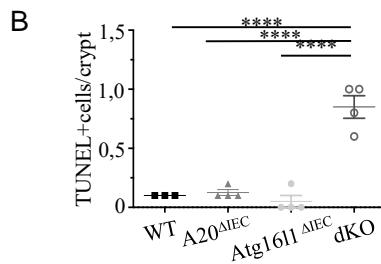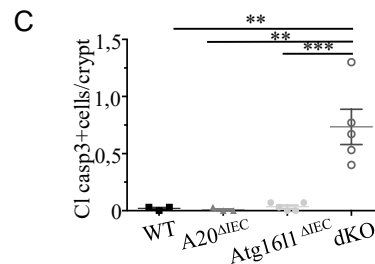

**Supplementary Figure 11. (A)** Immunostaining for Ki67, TUNEL (red) and cleaved caspase 3 on colon sections from WT, A20<sup>ΔIEC</sup>, Atg1611<sup>ΔIEC</sup> and dKO mice. Images representative of n=3-5 mice per genotype. Cell nuclei were counterstained with DAPI. Scale bars, bright-field 100μm; fluorescence 200μm; inserts 50μm **(B-C)** Quantification of TUNEL (B) and cleaved caspase 3-(C) positive cells in colon sections from WT, A20<sup>ΔIEC</sup>, Atg1611<sup>ΔIEC</sup> and dKO mice.

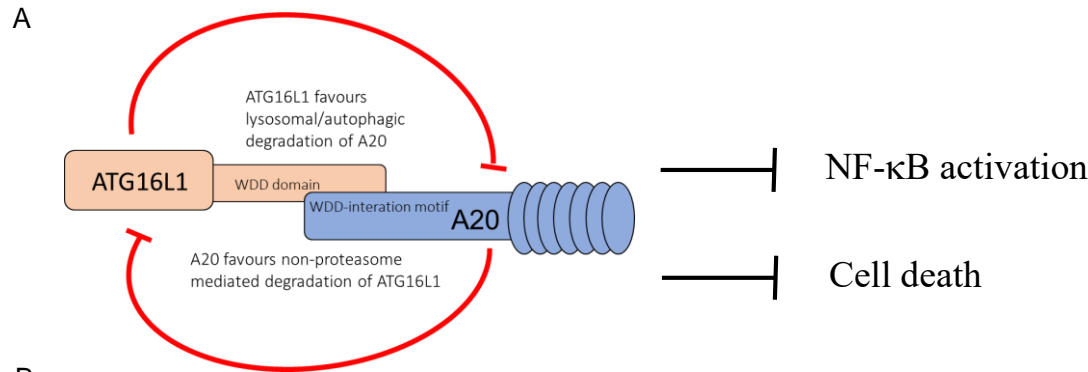

B

|                                               | <i>WT</i>                   | <i>A20</i> <sup>-/-</sup>                                  | <i>Atg16l1</i> <sup>-/-</sup>                              | <i>A20/Atg16l1</i> <sup>-/-</sup> |
|-----------------------------------------------|-----------------------------|------------------------------------------------------------|------------------------------------------------------------|-----------------------------------|
| <b>A20 and Atg16l1 protein levels</b>         | Balanced homeostatic levels | Atg16l1 stabilization                                      | A20 stabilization                                          | Absent                            |
| <b>Autophagy</b>                              | Balanced                    | Increased autophagy (LC3-II $\uparrow$ )                   | Defective autophagy                                        | Defective autophagy               |
| <b>NF-<math>\kappa</math>B activation</b>     | Balanced                    | Counterbalanced                                            | Increased, despite A20 stabilisation                       | Increased                         |
| <b><i>In vivo</i> pathological cell death</b> | Prevented                   | Prevented in steady state (sensitive to TNF induced death) | Prevented in steady state (sensitive to TNF induced death) | Spontaneous enterocyte cell death |

**Supplementary Figure 12. Summarizing model demonstrating A20-Atg16L1 cross-regulation to control intestinal homeostasis.**

Induction of Atg16l1 in A20-deficient cells promotes unconventional autophagy, enhanced p62 expression and reduced NF- $\kappa$ B activation that could keep under control the increased levels of NF- $\kappa$ B caused by absence of A20. Conversely, A20 upregulation in cells lacking Atg16l1 correlates with higher levels of p62, increased NF- $\kappa$ B activation and protection against cell death. Combined A20 and Atg16l1 deficiency promotes NF- $\kappa$ B-dependent inflammation and cell death inducing spontaneous intestinal pathology.

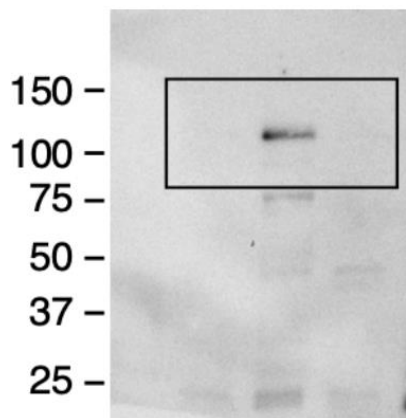

Fig. 2A-left (anti-HA)

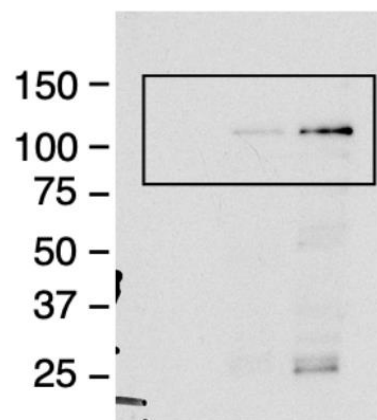

Fig. 2A-right (anti-HA)

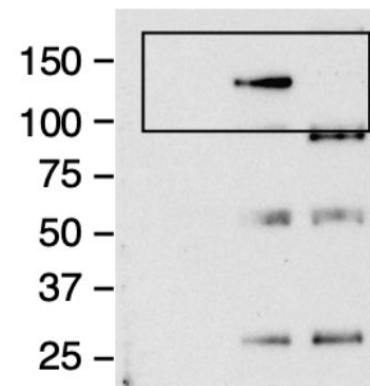

Fig. 2B-left (anti-Flag)

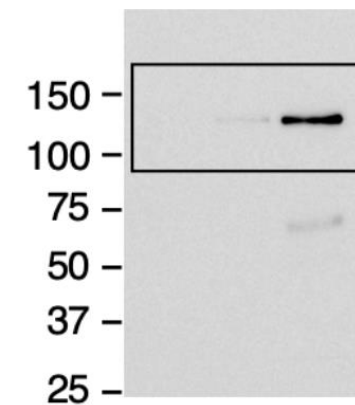

Fig. 2B-right (anti-Flag)

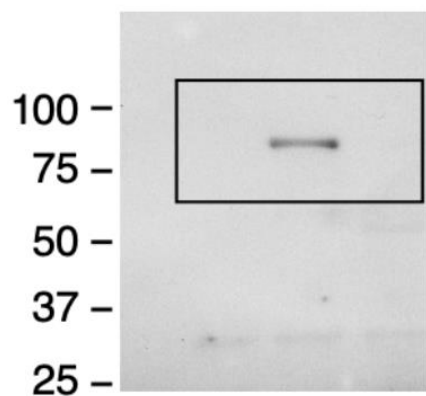

Fig. 2C-left (anti-HA)

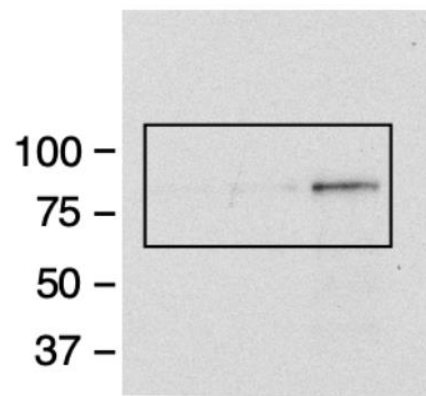

Fig. 2C-right (anti-HA)

Supplementary Figure 13. Uncropped scans of all Western blots

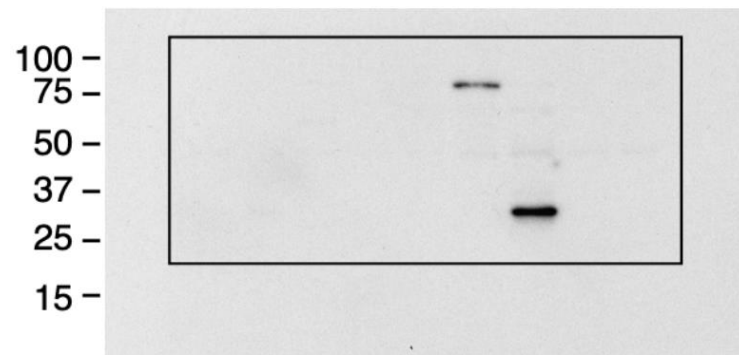

Fig. 3A (anti-HA)

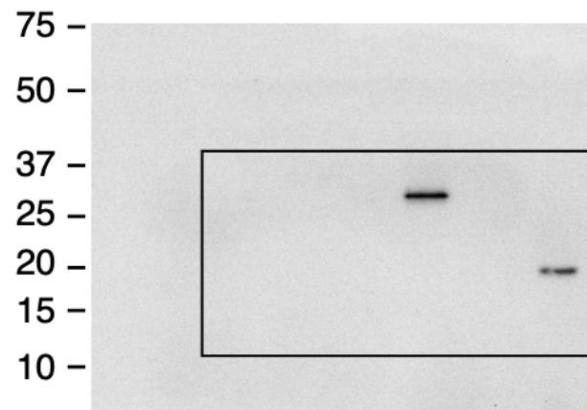

Fig. 3B (anti-HA)

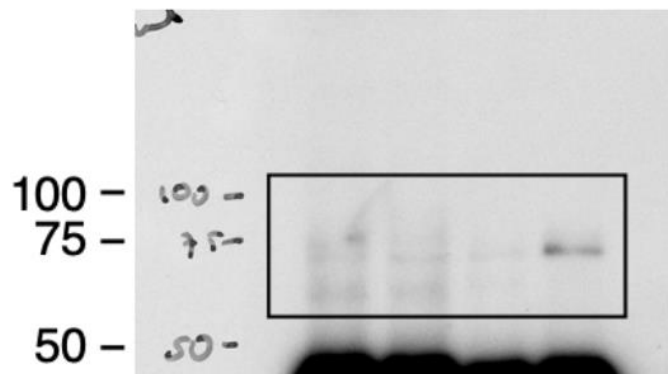

Fig. 3C-left (anti-Atg16I1)

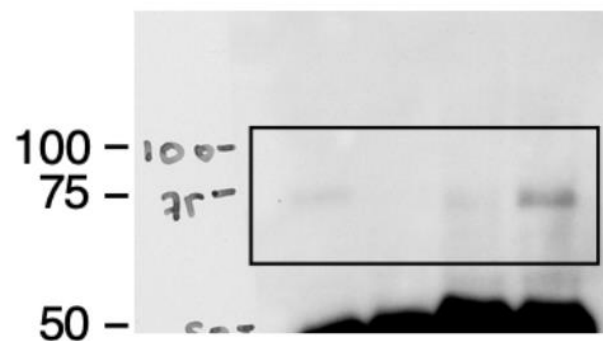

Fig. 3C-right (anti-Atg16I1)

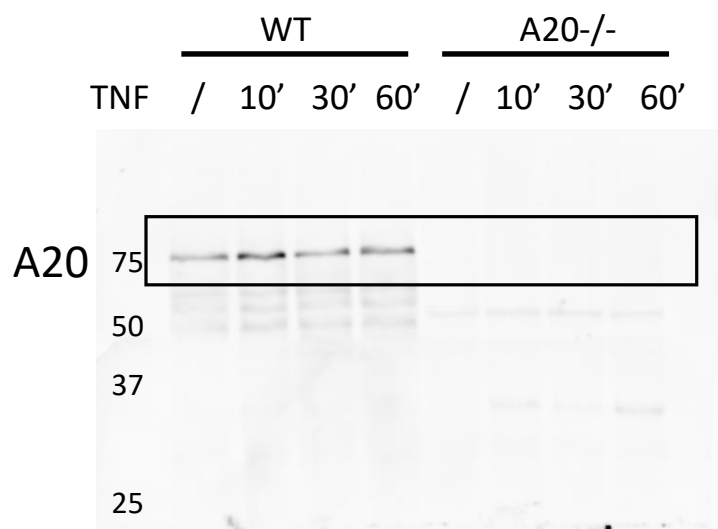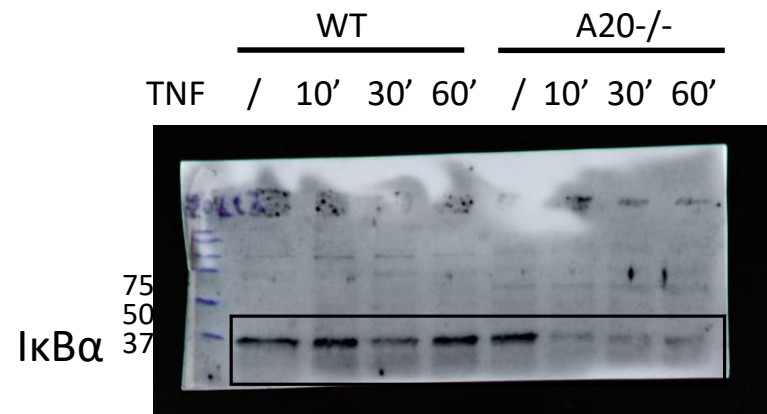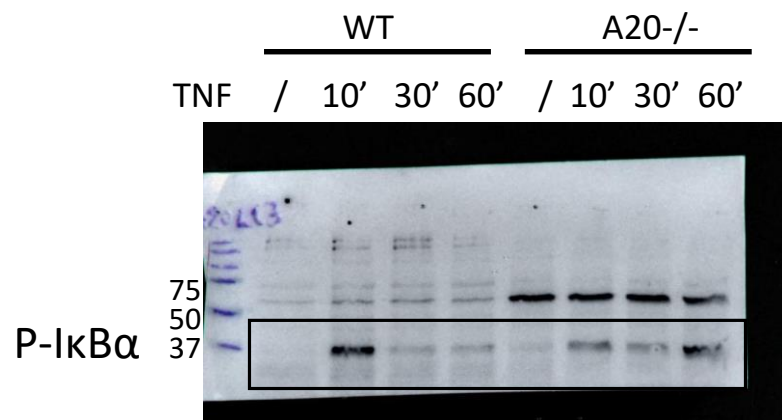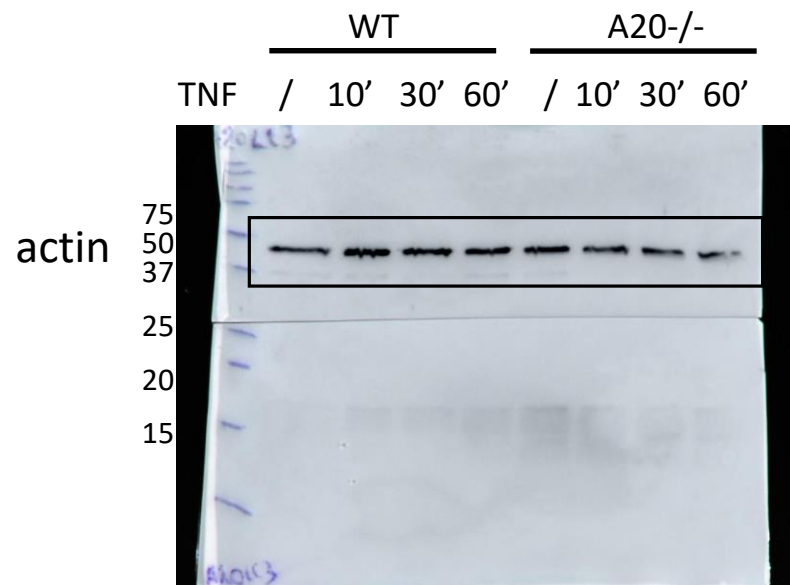

Fig.4 A top panel



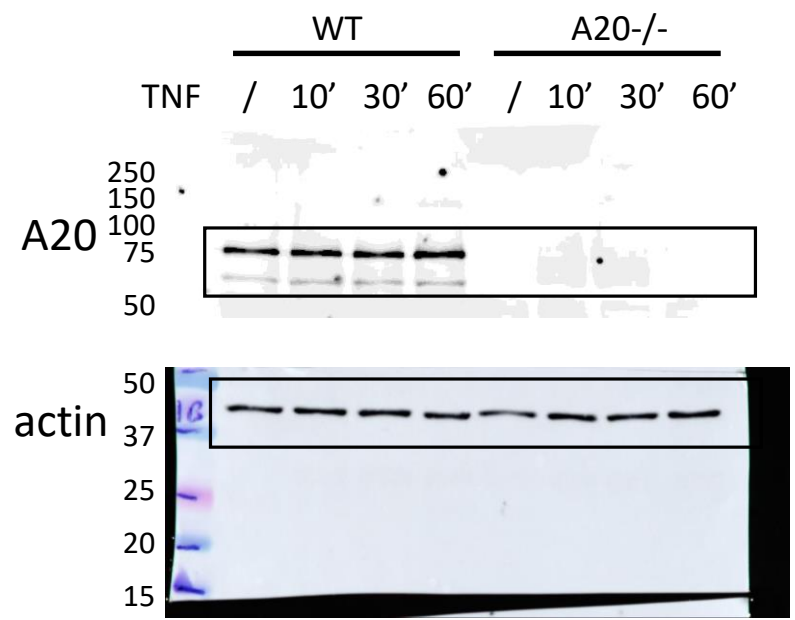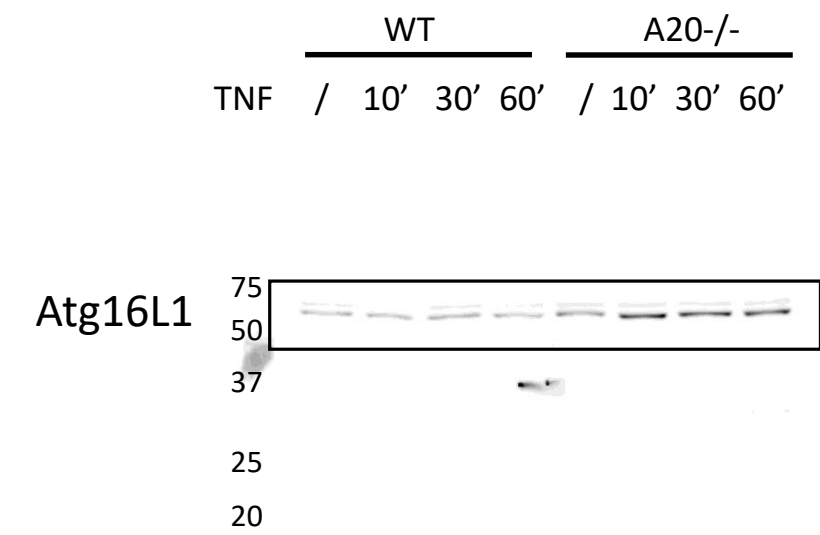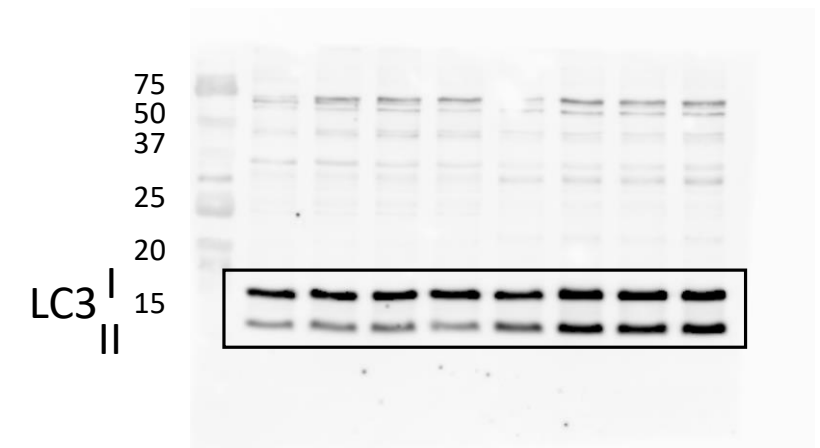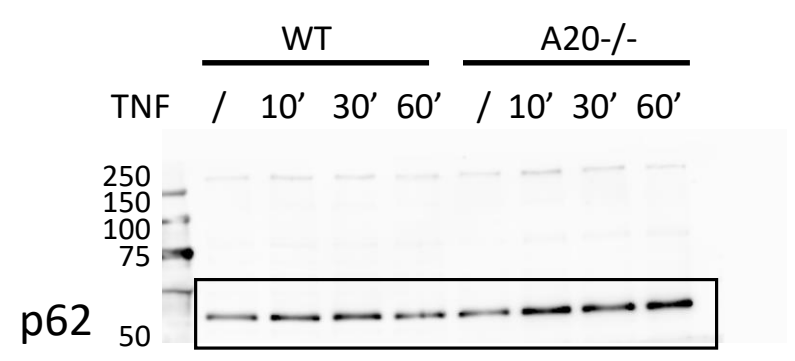

Fig.4 A bottom panel

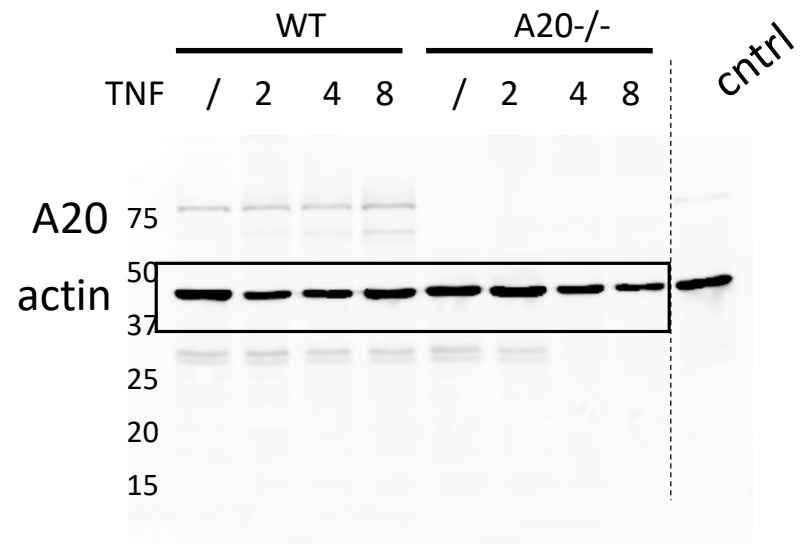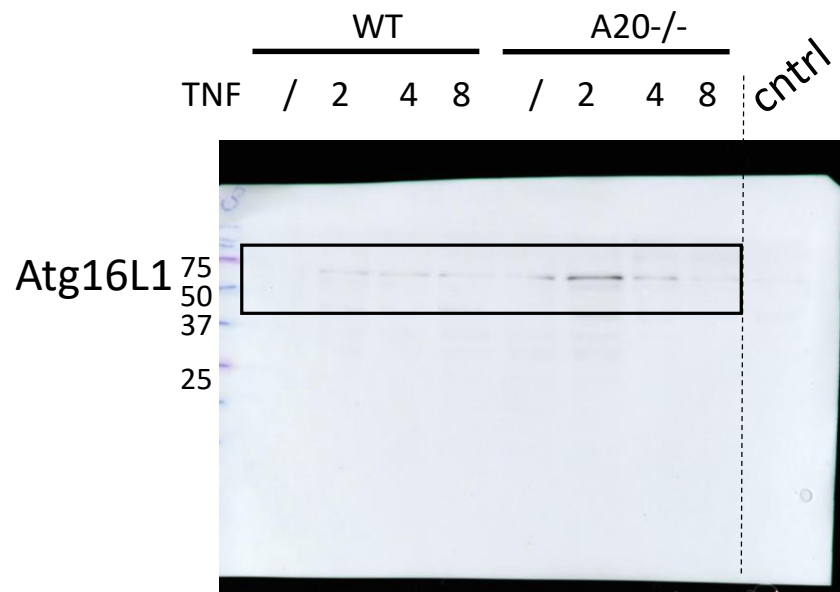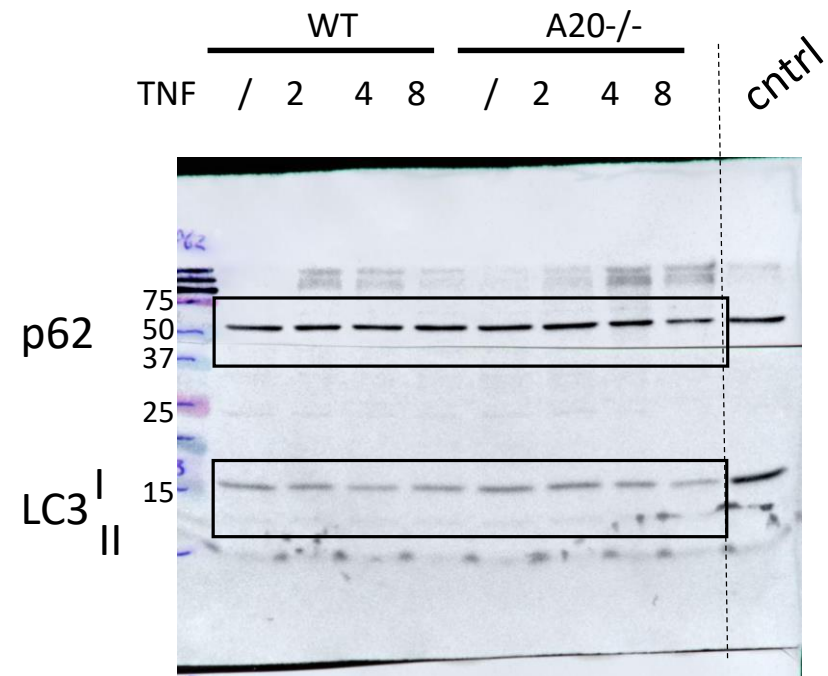

Fig.4 B

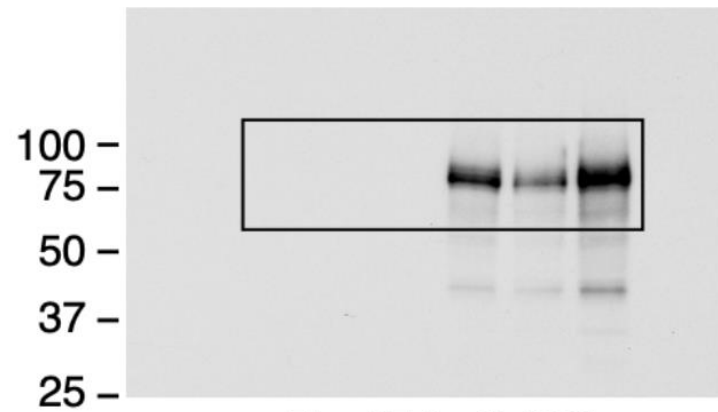

Fig. 4E (anti-A20)

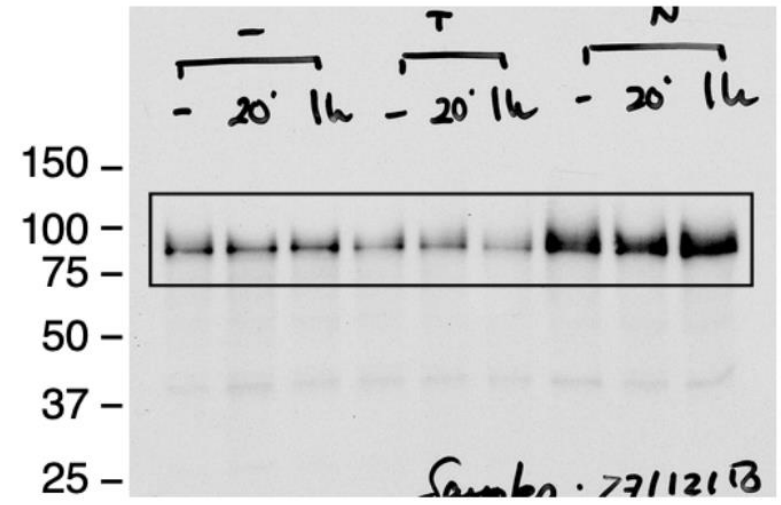

Fig. 4F (anti-A20)

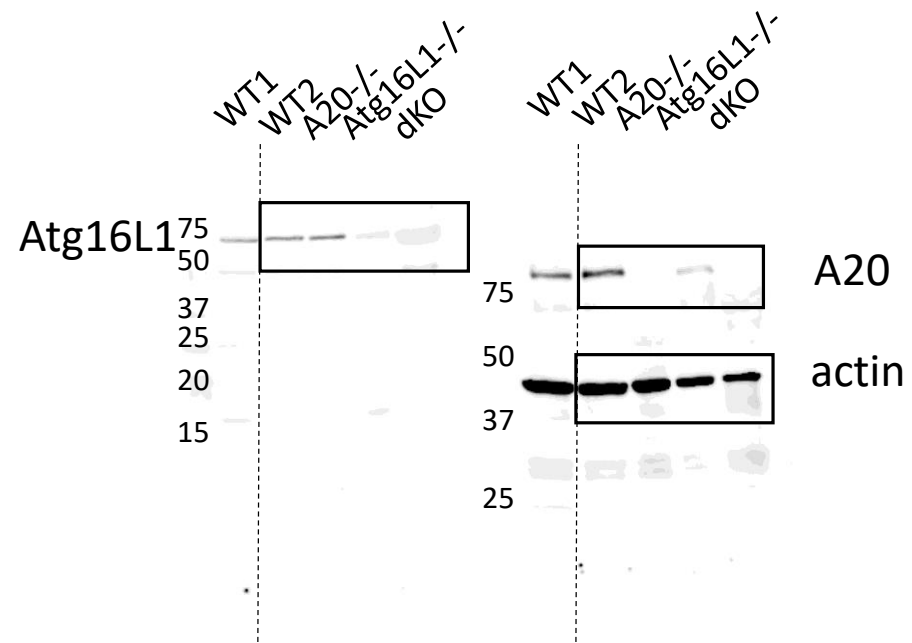

Fig.5 A

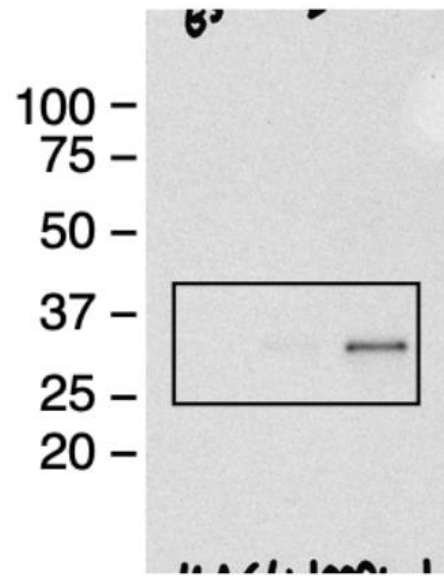

Suppl. Fig. 2A (anti-HA)

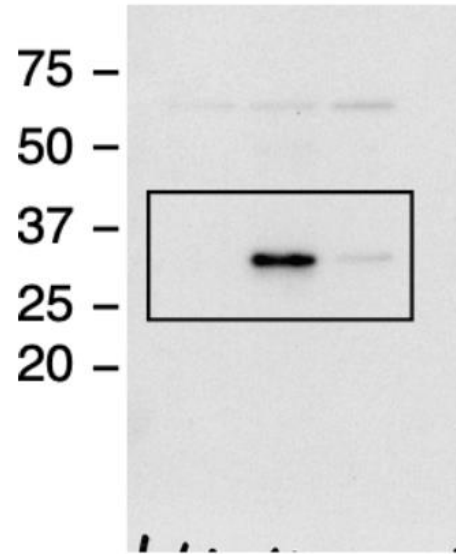

Suppl. Fig. 2B  
(anti-HA)

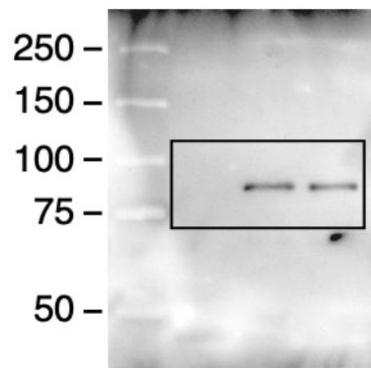

Suppl. Fig. 3A  
(anti-HA)

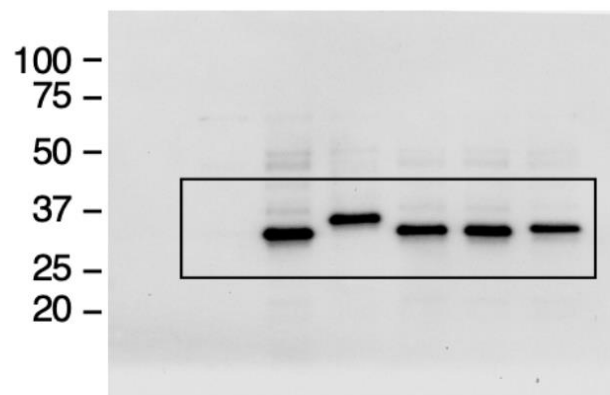

Suppl. Fig. 3B-left  
(anti-HA)

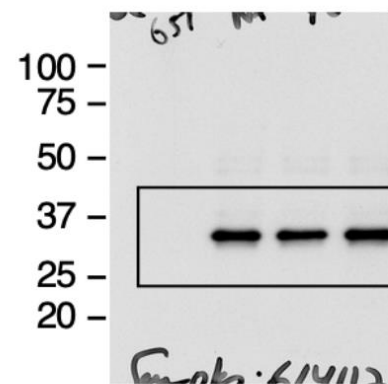

Suppl. Fig. 3B-center  
(anti-HA)

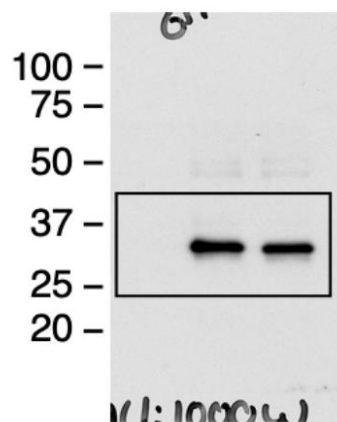

Suppl. Fig. 3B-right  
(anti-HA)

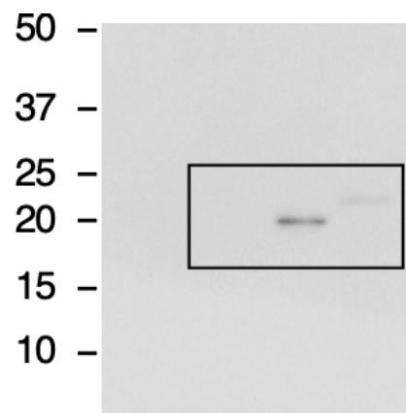

Suppl. Fig. 3C  
(anti-HA)

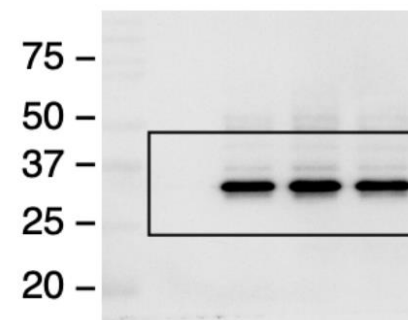

Suppl. Fig. 3D  
(anti-HA)

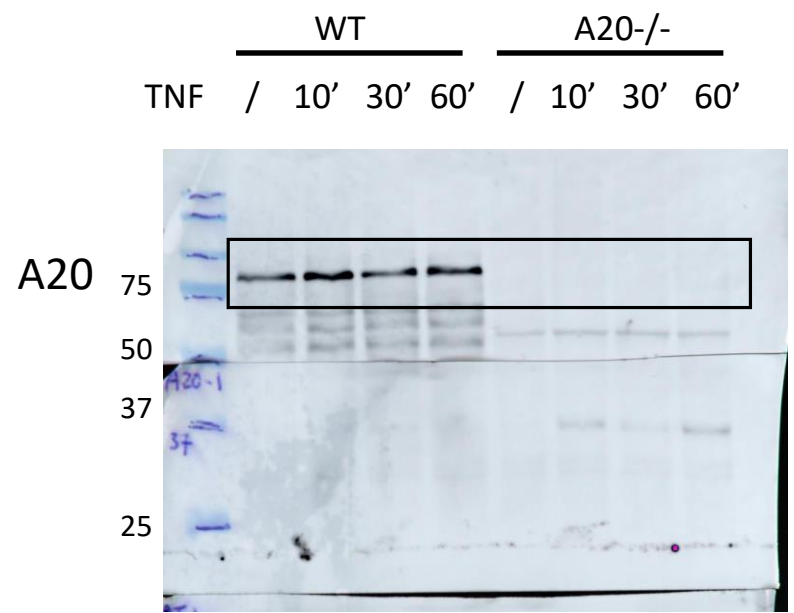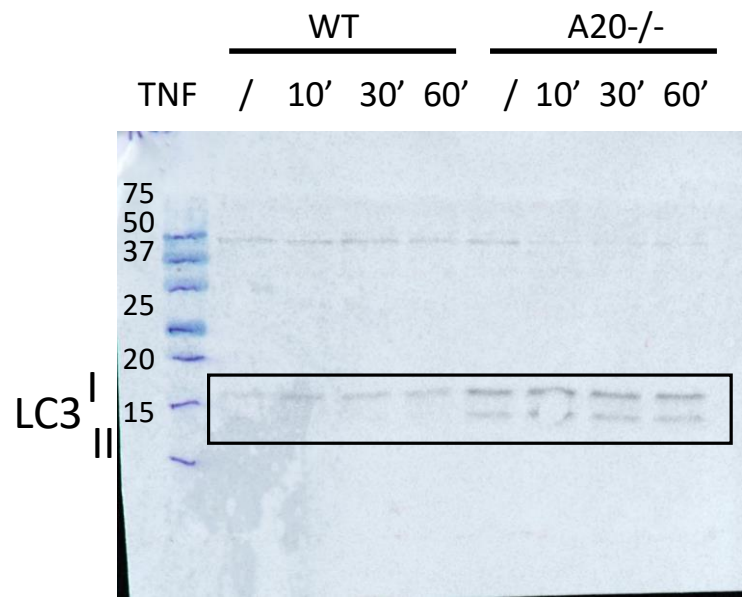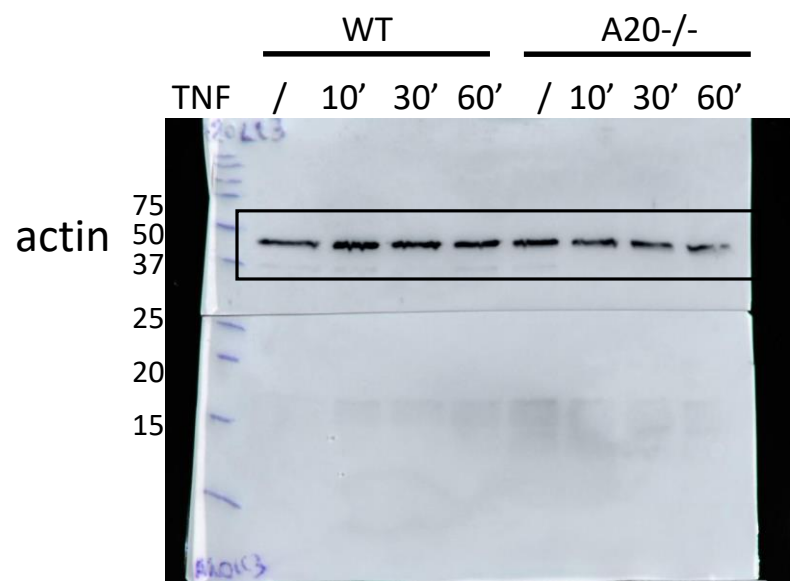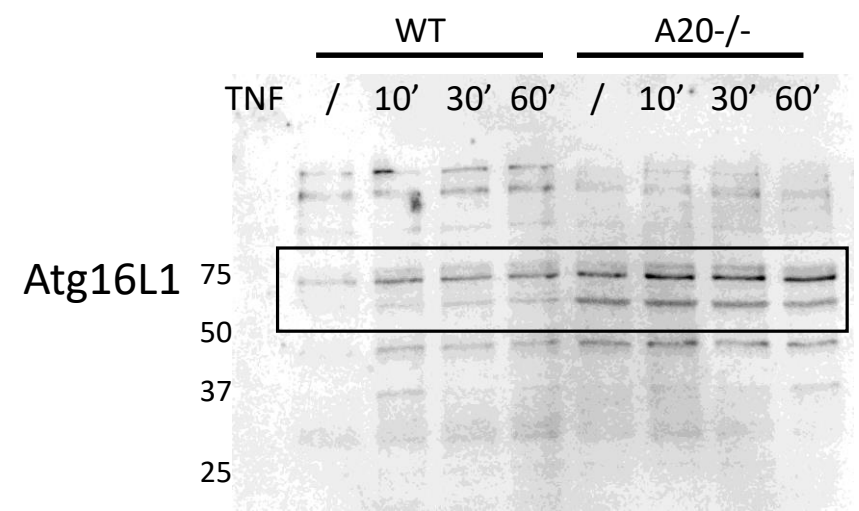

Sup. Fig.4 A

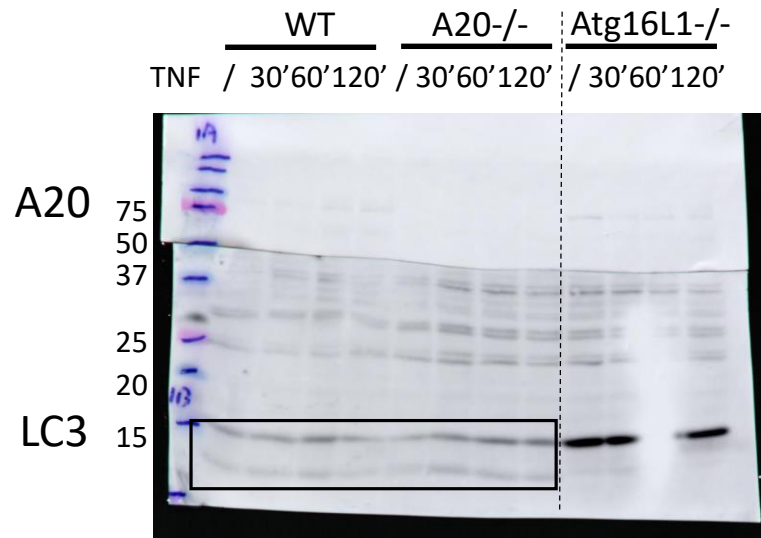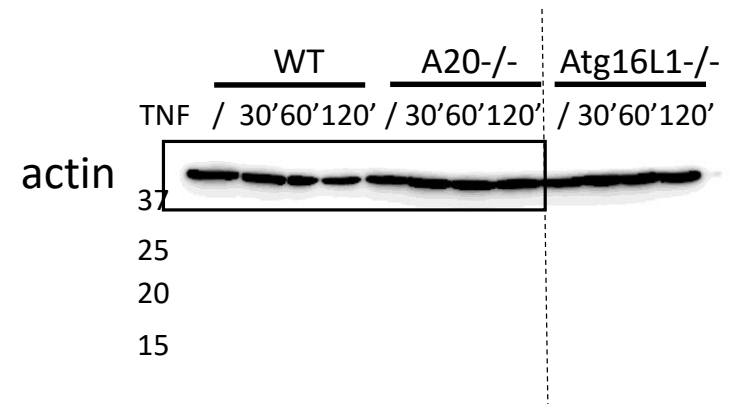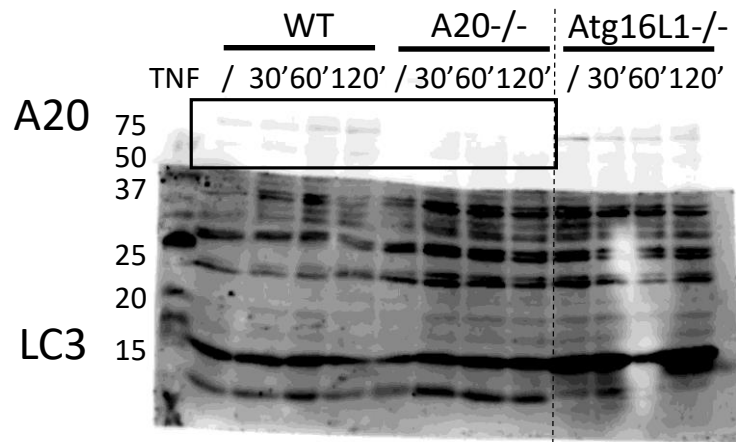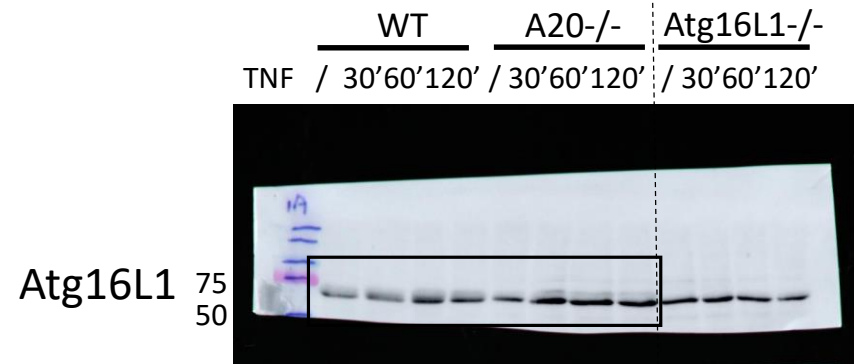



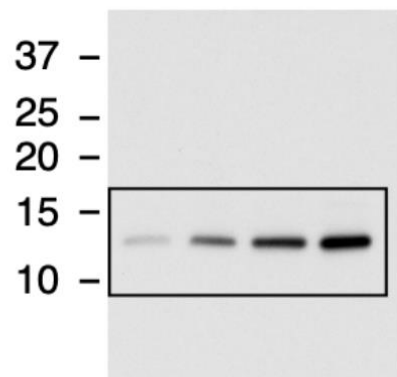

Suppl. Fig. 5A  
(anti-LC3)

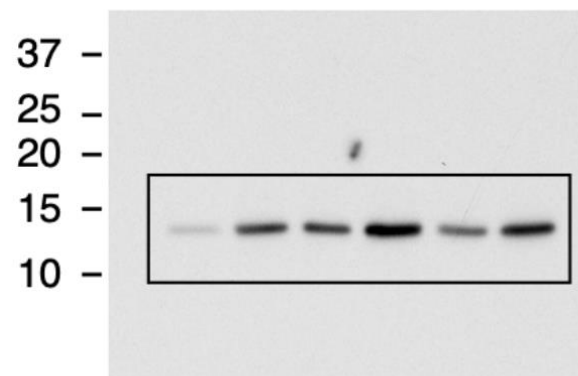

Suppl. Fig. 5B  
(anti-LC3)

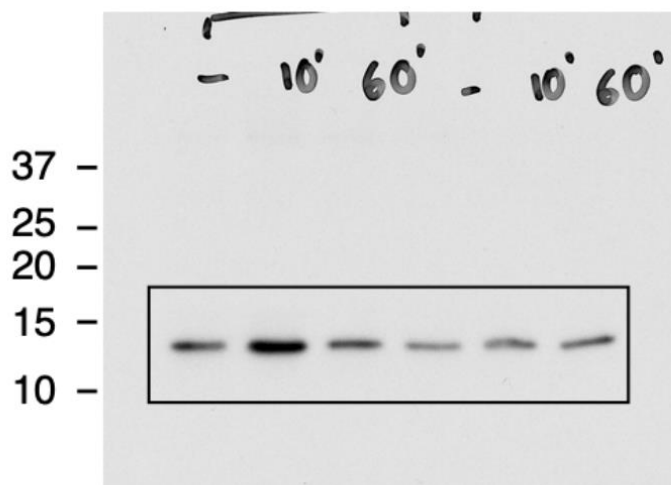

Suppl. Fig. 5C-left  
(anti-LC3)

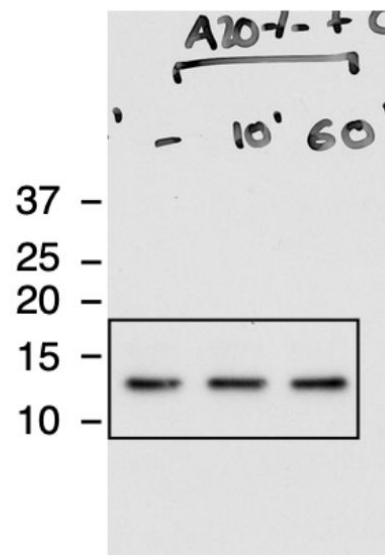

Suppl. Fig. 5C-right  
(anti-LC3)

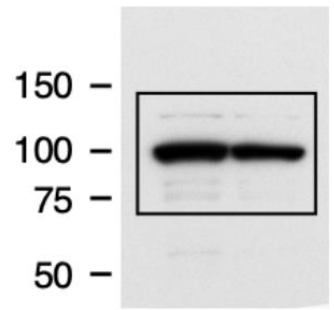

Suppl. Fig. 6-top  
(anti-GST)

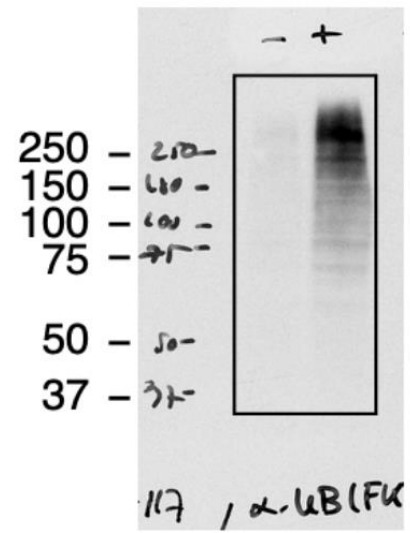

Suppl. Fig. 6-center  
(anti-UB (FK2))

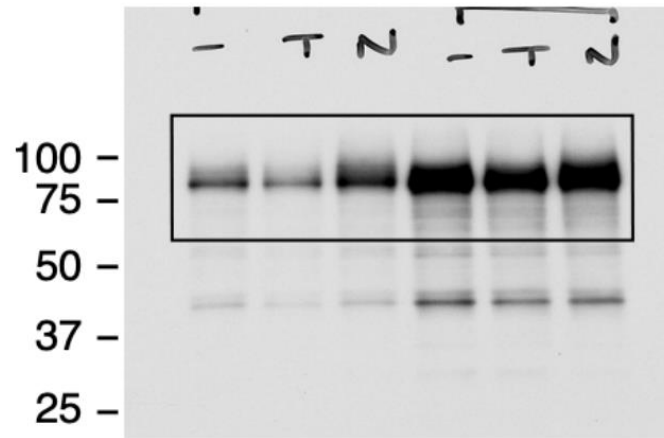

Suppl. Fig. 7A-left  
(anti-A20)

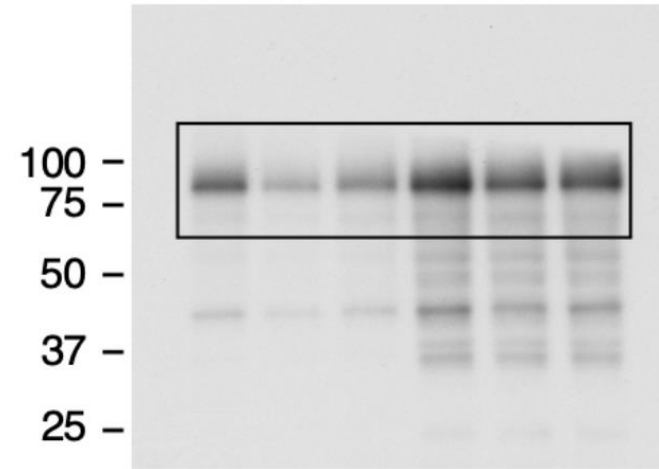

Suppl. Fig. 7A-right  
(anti-A20)

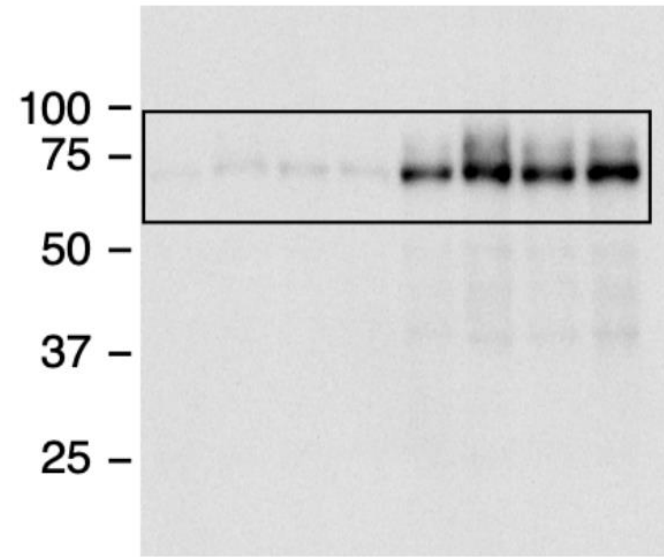

Suppl. Fig. 8A  
(anti-A20)

**Supplementary Table 1.** Oligonucleotides for PCR

|                      |                                                       |
|----------------------|-------------------------------------------------------|
| A20-Not-1-fw         | 5' gggcccgcggcccaatggctgaacaagtccttctc 3'             |
|                      |                                                       |
| A20-Xho-stop-263-rev | 5' cccgggctcgagtttacagggtcaccaagggtacaaaatgatggc 3'   |
|                      |                                                       |
| A20-Not-264-fw       | 5' gggcccgcggcccaaaggacagtgggcctgaaatccgagctgttc 3'   |
|                      |                                                       |
| A20-Not-357-fw       | 5' gggcccgcggccgcacaggaaaacagcgagcaggggaggagag 3'     |
|                      |                                                       |
| A20-Xho-stop-790-rev | 5' cccgggctcgagtttagccatacatctgcttgaactgaaagcattc 3'  |
|                      |                                                       |
| A20-Not-92-fw        | 5' gggcccgcggccgcacttgtggcgctgaaaacgaacggtgacgg 3'    |
|                      |                                                       |
| A20-Xho-stop-91-rev  | 5' cccgggctcgagtttacttccggacttctcgacaccagttgagtttc 3' |
|                      |                                                       |

Sequences of the oligonucleotides used to generate A20 constructs by PCR.

**Supplementary Table 2.** Oligonucleotides for site-directed mutagenesis

|                            |                                                             |
|----------------------------|-------------------------------------------------------------|
| A20-F127A,L130A-TOP        | 5' gtactgaggaaggcgctggccagcacggccaaggaacagacacagcaac 3'     |
| A20-F127A,L130A-BOTT       | 5' gttgcgtgtgtctgtttcttggccgtgctggccagcgccttctcagtac 3'     |
|                            |                                                             |
| A20-W168A,L171A-TOP        | 5' cggaaactggaatgatgaagccgacaatgctatcaaaatggcttccacag 3'    |
| A20-W168A,L171A-BOTT       | 5' ctgtggaagccattttgatagcattgtcggcttcatcattccagttccg 3'     |
|                            |                                                             |
| A20-Y188A,L191A-TOP        | 5' gccgaagtggacttcaggccaactcagccgaagaaatacacatatttg 3'      |
| A20-Y188A,L191A-BOTT       | 5' caaatatgtgtatttctcggtgagttggcctgaagtccacttcgggc 3'       |
|                            |                                                             |
| A20-F224A,L227A-TOP        | 5' gtttggaaatcaggttccaatgcccccctgcgaaagtgggtggaatttacttg 3' |
| A20-F224A,L227A-BOTT       | 5' caagtaaattccaccactttcgcagggggcggcattggaacctgattccaac 3'  |
|                            |                                                             |
| A20-Y233A,L236A-TOP        | 5' ctttgaagtgggtggaattgccttgctgcccactggcctgccaggaatg 3'     |
| A20-Y233A,L236A-BOTT       | 5' cattcctgggcaggccagtgggcaggcaaggcaattccaccactttcaaag 3'   |
|                            |                                                             |
| A20-L227A,Y233A,L236A-TOP  | 5' ctgcgaaagtgggtggaattgccttgctgcccactggcctgccaggaatg 3'    |
| A20-L227A,Y233A,L236A-BOTT | 5' cattcctgggcaggccagtgggcaggcaaggcaattccaccactttcgcag 3'   |
|                            |                                                             |
| A20-Y246A,V249A-TOP        | 5' gccaggaatgctacagagccccattgctctcggctatgacagccatc 3'       |
| A20-Y246A,V249A-BOTT       | 5' gatggctgtcatagccgagagcaatgggggctctgtagcattcctgggc 3'     |
|                            |                                                             |
| A20-F257A,L260A-TOP        | 5' ggctatgacagccatcatgctgtaccgcggtgaccctgaaggacagtg 3'      |
| A20-F257A,L260A-BOTT       | 5' cactgtccttcagggtcaccgcgggtacagcatgatggctgtcatagcc 3'     |
|                            |                                                             |
| A20-A125V-TOP              | 5' cttgtactgaggaagtgctgttcagcacgctcaag 3'                   |
| A20-A125V-BOTT             | 5' cttgagcgtgctgaacagcaccttctcagtagcaag 3'                  |
|                            |                                                             |
| A20-F127C-TOP              | 5' ctgaggaaggcgctgtgcagcacgctcaaggaac 3'                    |
| A20-F127C-BOTT             | 5' gtttcttgagcgtgctgcacagcgccttctcag 3'                     |
|                            |                                                             |

Sequences of the oligonucleotides used to generate A20 WDD-binding motif mutants by site-directed mutagenesis.
