# Supplementary material for: Physical and functional interaction between A20 and ATG16L1-WD40 domain in the control of intestinal homeostasis
Source: PubMed Central journal article supplement (PMC6478926; doi:10.1038/s41467-019-09667-z), 2019-04-23
Supplement: 41467_2019_9667_MOESM4_ESM.pdf [file 41467_2019_9667_MOESM4_ESM.pdf]

## Description of Additional Supplementary Files

Supplementary Data 1:

**Complete lists of Uniprot entries and associated mass spectrometry data of the proteins identified in the different cellular systems.** Lists are arranged according to the cell lines and conditions used for the proteomics approach: JAR cells, unactivated THP-1 cells and THP-1 cells activated with LPS (5 µg/ml) and PMA (50 ng/ml) for 24 h.

Supplementary Data 2:

**Curated lists of Uniprot entries identified in the proteomics assay.** Entries shown in Supplementary Data 1 were curated to remove non-human and redundant references, manually substitute obsolete and unreviewed entries for reviewed ones, and select those present in less than 10% (41) of the unspecific assays included in the Crapome database (411).

Supplementary Data 3:

**Venn analysis of the identified proteins.** Proteins included in Supplementary Data 2 were subjected to a Venn algorithm to establish the degree of redundancy of the proteins identified in the three experimental systems.

Supplementary Data 4:

**Unified list of identified proteins classified according to their functional annotation.** Entries shown in Supplementary Data 2 were classified according to their annotation in the Function [CC] and/or Gene Ontology (biological process) fields (Uniprot) as involved in different cellular processes, including inflammation/innate immunity, apoptosis/cell death, adhesion, autophagy, DNA replication/damage/repair, immune response, cell signaling or intracellular trafficking.
